# Supplementary material
Source: PubMed Central journal article supplement (PMC4103263)
Supplement: Supp_Table1.pdf [file Supp_Table1.pdf]

## Supplementary Data

SUPPLEMENTARY TABLE S1. LIST OF APPLIED  
BIOSYSTEM GENE EXPRESSION ASSAY IDs

---

|            |               |
|------------|---------------|
| Chx10      | Mm00432549_m1 |
| Hb9        | Mm00658300_g1 |
| Foxn4      | Mm00521694_m1 |
| Gata3      | Mm00484683_m1 |
| Beta-actin | Mm02619580_g1 |
| Lhx3       | Mm00521922_m1 |
| Irx3       | Mm00500463_m1 |
| Hoxa3      | Mm01326402_m1 |
| Hoxc5      | Mm00433971_m1 |
| Hoxc8      | Mm00439369_m1 |
| Crx        | Mm00433971_m1 |

---
